# Supplementary material
Source: publisher figshare collection journal article supplement (https://gsapubs.figshare.com/ndownloader/files/22398432)
Supplement: Supplementary file 1 [file 22398432]

| SUPPLEMENTAL TABLE 1. MAJOR AND TRACE-ELEMENT ANALYSIS OF CORONITIC METAGABBROS | | | | | | | | | | | | | |
| --- | --- | --- | --- | --- | --- | --- | --- | --- | --- | --- | --- | --- | --- |
|  | | | | | | | | | | | | | |
| **Sample** | **SiO2** | **TiO2** | **Al2O3** | **Fe2O3** | **FeO** | **MgO** | **CaO** | **Na2O** | **K2O** | **P2O5** | **MnO** | **H2O** | **Total** |
| AN30A | 50.90 | 2.40 | 19.40 | 0.94 | 8.44 | 3.32 | 11.80 | 3.67 | 0.78 | 0.12 | 0.21 | 0.20 | 102.18 |
| AN30B | 49.80 | 2.82 | 18.10 | 1.10 | 9.60 | 3.82 | 12.20 | 3.40 | 0.70 | 0.10 | 0.20 | 0.18 | 102.02 |
| AN30D | 51.20 | 2.36 | 19.40 | 0.93 | 8.40 | 2.99 | 11.60 | 3.85 | 0.82 | 0.12 | 0.14 | 0.23 | 102.04 |
| AN31-1 | 47.90 | 3.64 | 16.20 | 1.30 | 11.40 | 4.10 | 11.90 | 3.09 | 0.81 | 0.40 | 0.26 | 0.27 | 101.27 |
| MGJM21 | 43.70 | 2.14 | 14.30 | 1.80 | 15.80 | 10.50 | 7.75 | 2.45 | 0.68 | 0.35 | 0.20 | 0.56 | 100.23 |
| MGJM22 | 45.60 | 2.00 | 14.30 | 1.80 | 15.80 | 10.40 | 7.30 | 2.48 | 0.66 | 0.33 | 0.21 | 0.53 | 101.41 |
| MGJM31 | 46.90 | 3.01 | 16.80 | 1.60 | 14.20 | 5.33 | 8.06 | 3.43 | 0.05 | 0.38 | 0.17 | 0.31 | 100.24 |
| MGJM32 | 46.00 | 3.41 | 16.50 | 1.20 | 14.70 | 5.08 | 8.29 | 3.23 | 0.78 | 0.32 | 0.18 | 0.31 | 100.00 |
| MGJM41 | 46.50 | 2.33 | 16.80 | 1.40 | 14.00 | 6.01 | 8.54 | 3.59 | 0.84 | 0.44 | 0.18 | 0.19 | 100.82 |
| MGJM42 | 44.00 | 2.17 | 15.90 | 1.40 | 14.30 | 7.93 | 8.89 | 3.27 | 0.74 | 0.36 | 0.16 | 0.35 | 99.47 |
| MGJM61 | 46.60 | 1.39 | 17.90 | 1.20 | 11.10 | 5.95 | 8.97 | 2.56 | 0.48 | 0.22 | 0.14 | 0.41 | 96.92 |
| MGJM62 | 46.30 | 2.46 | 14.00 | 1.70 | 15.00 | 8.09 | 10.20 | 2.08 | 0.76 | 0.45 | 0.20 | 0.53 | 101.77 |
| MGJM71 | 47.40 | 1.42 | 18.40 | 1.30 | 11.70 | 8.44 | 8.60 | 2.91 | 0.60 | 0.30 | 0.15 | 0.42 | 101.64 |
| MG108 | 46.70 | 0.68 | 15.10 | 1.30 | 11.50 | 12.40 | 10.40 | 1.94 | 0.34 | 0.05 | 0.17 | 0.44 | 101.02 |
| MG111 | 45.30 | 0.54 | 17.40 | 1.30 | 11.50 | 11.60 | 9.60 | 2.60 | 0.40 | 0.13 | 0.16 | 0.37 | 100.90 |
| MG18/7 | 46.40 | 2.72 | 17.20 | 1.50 | 13.50 | 5.52 | 8.17 | 3.24 | 0.80 | 0.35 | 0.18 | 0.52 | 100.10 |
| MGJMC/ | 47.30 | 1.52 | 18.60 | 1.30 | 11.60 | 5.78 | 8.56 | 3.33 | 0.62 | 0.26 | 0.16 | 0.48 | 99.51 |
| AN21 | 54.40 | 0.48 | 24.10 | 0.36 | 3.24 | 0.93 | 9.85 | 4.66 | 0.99 | 0.19 | 0.04 | 0.24 | 99.48 |
| AN26B | 54.20 | 0.42 | 24.30 | 0.31 | 2.84 | 1.18 | 9.85 | 5.02 | 1.02 | 0.18 | 0.06 | 0.23 | 99.61 |
| AN26C | 52.50 | 0.96 | 22.60 | 0.52 | 4.72 | 2.25 | 11.80 | 4.54 | 0.82 | 0.16 | 0.10 | 0.24 | 101.21 |
| TC29 | 45.50 | 0.57 | 16.57 | 0.50 | 11.47 | 10.88 | 8.00 | 2.38 | 0.33 | 0.07 | 0.15 | 0.48 | 96.90 |
| MG50 | 47.11 | 0.26 | 19.50 | 0.50 | 8.72 | 8.62 | 8.46 | 2.82 | 0.29 | 0.03 | 0.12 | 0.42 | 96.85 |
| MG66 | 45.57 | 1.33 | 16.48 | 0.50 | 11.53 | 9.26 | 8.19 | 2.77 | 0.49 | 0.23 | 0.16 | 0.68 | 97.19 |
| MG73A | 46.43 | 0.39 | 17.94 | 0.50 | 11.13 | 8.70 | 8.06 | 2.83 | 0.40 | 0.11 | 0.15 | 0.13 | 96.77 |
| MG98 | 44.70 | 0.36 | 14.10 | 0.50 | 13.95 | 15.31 | 7.39 | 1.56 | 0.22 | 0.06 | 0.19 | 0.36 | 98.70 |
| MG104 | 43.43 | 0.49 | 14.63 | 0.50 | 12.87 | 14.40 | 7.54 | 2.06 | 0.30 | 0.06 | 0.18 | 0.52 | 96.98 |
| MG106 | 44.25 | 1.33 | 13.55 | 0.50 | 14.34 | 11.46 | 8.61 | 1.92 | 0.35 | 0.11 | 0.20 | 0.21 | 96.83 |
| MG162 | 46.99 | 1.35 | 18.11 | 0.50 | 9.92 | 7.38 | 9.37 | 2.84 | 0.52 | 0.09 | 0.13 | 0.17 | 97.37 |
| MG174 | 42.53 | 0.43 | 10.97 | 0.50 | 15.93 | 19.20 | 6.86 | 1.25 | 0.17 | 0.04 | 0.22 | 0.40 | 98.50 |
| AN215 | 53.29 | 0.45 | 23.69 | 0.50 | 2.65 | 0.87 | 9.58 | 4.33 | 0.83 | 0.15 | 0.04 | 1.32 | 97.70 |
| FERMG | 46.11 | 2.46 | 15.42 | 0.50 | 17.10 | 6.53 | 8.17 | 2.57 | 0.98 | 0.38 | 0.21 | 0.00 | 100.43 |
| ODAG | 49.69 | 2.93 | 19.76 | 0.00 | 9.80 | 2.55 | 9.84 | 3.04 | 0.64 | 0.46 | 0.11 | 0.27 | 99.09 |
| AVWTF | 53.54 | 0.72 | 22.50 | 0.00 | 5.40 | 2.21 | 10.12 | 3.70 | 1.19 | 0.13 | 0.07 | 0.12 | 99.70 |
| BUGAN | 50.50 | 1.15 | 21.28 | 0.56 | 11.70 | 2.08 | 8.72 | 2.95 | 0.62 | 0.12 | 0.40 | 0.41 | 100.49 |
| OD2 | 50.14 | 2.65 | 20.25 | 1.00 | 8.00 | 2.44 | 9.93 | 3.02 | 0.73 | 0.47 | 0.08 | 0.23 | 98.94 |
| BRI | 44.00 | 1.75 | 13.73 | 0.50 | 17.23 | 12.43 | 7.50 | 1.91 | 0.51 | 0.12 | 0.21 | 0.00 | 99.89 |
| 6153 | 46.10 | 1.30 | 17.68 | 0.50 | 12.33 | 9.91 | 9.10 | 2.35 | 0.39 | 0.19 | 0.15 | 0.00 | 100.00 |
| MG6725 | 46.35 | 1.76 | 17.51 | 0.50 | 13.96 | 7.77 | 8.81 | 2.82 | 0.53 | 0.22 | 0.16 | 0.00 | 100.39 |
| TGAS1 | 45.95 | 2.20 | 16.79 | 1.69 | 13.15 | 8.18 | 8.15 | 2.94 | 0.77 | 0.39 | 0.20 | 0.37 | 100.78 |
| TGAS3 | 48.88 | 1.84 | 19.85 | 1.49 | 8.37 | 5.34 | 8.92 | 3.97 | 0.89 | 0.35 | 0.13 | 0.48 | 100.51 |
| TGAS5 | 47.60 | 2.90 | 15.41 | 1.62 | 13.43 | 6.17 | 8.30 | 3.19 | 0.95 | 0.45 | 0.21 | 0.48 | 100.71 |
| TGAS6 | 47.97 | 1.58 | 19.75 | 0.80 | 9.07 | 5.98 | 9.21 | 3.42 | 0.82 | 0.35 | 0.15 | 0.34 | 99.44 |
| TGAS7 | 46.14 | 1.09 | 18.11 | 1.61 | 10.16 | 9.36 | 8.17 | 3.19 | 0.60 | 0.15 | 0.15 | 0.64 | 99.37 |
| SM5872 | 48.43 | 0.66 | 18.12 | 0.50 | 10.76 | 9.71 | 8.56 | 2.74 | 0.37 | 0.20 | 0.14 | 0.00 | 100.19 |
| SM5875 | 47.50 | 2.72 | 15.00 | 0.50 | 13.60 | 7.92 | 8.50 | 2.82 | 0.99 | 0.42 | 0.17 | 0.00 | 100.14 |
| TX-8 | 47.26 | 0.75 | 18.61 | **FeT →** | 9.46 | 11.07 | 9.47 | 2.85 | 0.45 | 0.10 | 0.13 | -0.18 | 99.97 |
| TX-10 | 48.40 | 0.80 | 19.75 |  | 9.16 | 9.55 | 8.75 | 2.68 | 0.46 | 0.13 | 0.12 | 0.18 | 99.98 |
| TX-11 | 48.11 | 1.20 | 19.36 |  | 9.18 | 9.71 | 8.48 | 2.73 | 0.48 | 0.19 | 0.12 | 0.18 | 99.74 |
| TX-T | 47.23 | 0.81 | 19.32 |  | 11.15 | 8.48 | 8.41 | 3.03 | 0.47 | 0.15 | 0.13 | -0.23 | 98.95 |
| TX-6 | 47.46 | 0.79 | 19.07 |  | 11.91 | 9.62 | 8.35 | 2.79 | 0.46 | 0.14 | 0.15 | -0.39 | 100.35 |
| TX-7 | 48.05 | 0.87 | 19.17 |  | 11.90 | 9.55 | 8.60 | 2.51 | 0.45 | 0.12 | 0.15 | 0.38 | 101.75 |
| TX-1 | 47.36 | 1.13 | 18.12 |  | 12.69 | 8.81 | 8.28 | 3.05 | 0.58 | 0.17 | 0.15 | 0.14 | 100.48 |
| TX-2 | 48.02 | 0.72 | 19.73 |  | 10.96 | 6.99 | 8.69 | 2.98 | 0.58 | 0.17 | 0.15 | 0.46 | 99.45 |
| TX-2 | 48.04 | 0.72 | 19.73 |  | 10.96 | 6.99 | 8.69 | 2.98 | 0.58 | 0.17 | 0.15 | 0.46 | 99.47 |
| TH-1 | 46.01 | 1.12 | 18.07 |  | 12.39 | 9.08 | 8.40 | 2.34 | 0.50 | 0.18 | 0.15 | -0.10 | 98.14 |
| TH-3 | 47.01 | 0.75 | 17.32 |  | 13.78 | 9.68 | 7.85 | 2.45 | 0.55 | 0.24 | 0.18 | 0.20 | 100.01 |
| TH-5 | 44.90 | 2.03 | 14.96 |  | 16.62 | 8.11 | 7.76 | 2.70 | 0.76 | 0.21 | 0.23 | 0.40 | 98.68 |
| TH-2 | 47.30 | 1.00 | 17.89 |  | 12.83 | 9.29 | 8.28 | 2.64 | 0.49 | 0.17 | 0.16 | 0.01 | 100.06 |
| IL-3 | 47.57 | 2.18 | 18.05 |  | 12.36 | 6.41 | 9.08 | 2.88 | 0.69 | 0.25 | 0.17 | 0.25 | 99.89 |
| LD-1 | 47.40 | 1.49 | 18.30 |  | 12.03 | 7.33 | 9.27 | 3.04 | 0.70 | 0.20 | 0.15 | -0.12 | 99.79 |
| LD2 | 46.38 | 2.23 | 17.25 |  | 14.07 | 8.71 | 7.82 | 2.91 | 0.60 | 0.19 | 0.18 | -0.41 | 99.93 |
| NR-1A | 46.70 | 1.33 | 17.80 |  | 13.95 | 7.58 | 9.18 | 3.05 | 0.70 | 0.28 | 0.18 | -0.10 | 100.65 |
| NR-1B | 46.61 | 1.76 | 17.12 |  | 13.39 | 6.98 | 8.46 | 3.03 | 0.73 | 0.24 | 0.17 | 0.52 | 99.01 |
| ND-1D | 47.30 | 1.60 | 17.70 |  | 13.50 | 7.37 | 8.95 | 3.18 | 0.74 | 0.23 | 0.17 | -0.10 | 100.64 |
| GMT1 | 46.31 | 0.57 | 15.67 |  | 13.68 | 11.88 | 7.41 | 1.61 | 0.45 | 0.08 | 0.18 | 0.23 | 98.07 |
| W184 | 44.90 | 0.18 | 17.80 |  | 11.10 | 13.60 | 8.08 | 2.72 | 0.26 | 0.04 | 0.14 | 0.47 | 99.29 |
| DT341 | 47.30 | 2.49 | 18.01 |  | 14.73 | 5.09 | 8.10 | 3.17 | 0.95 | 0.44 | 0.18 | 0.30 | 100.76 |
| DT326 | 46.80 | 2.40 | 16.90 |  | 14.60 | 6.70 | 7.80 | 2.98 | 1.05 | 0.31 | 0.21 | 0.80 | 100.55 |
| DT343 | 46.95 | 2.46 | 17.25 |  | 14.50 | 5.48 | 8.76 | 3.16 | 0.90 | 0.36 | 0.18 | 0.20 | 100.20 |
| DT341 | 46.50 | 2.33 | 16.80 |  | 15.50 | 6.01 | 8.53 | 3.59 | 0.84 | 0.44 | 0.18 | 0.19 | 100.91 |
| DT397 | 46.99 | 2.55 | 16.43 |  | 14.71 | 7.43 | 7.44 | 2.97 | 0.95 | 0.36 | 0.22 | -0.01 | 100.04 |
| DT223 | 43.70 | 2.14 | 14.30 |  | 17.60 | 10.50 | 7.75 | 2.45 | 0.68 | 0.20 | 0.20 | 0.40 | 99.92 |
| DT270 | 44.80 | 2.16 | 14.30 |  | 17.60 | 10.40 | 7.30 | 2.48 | 0.66 | 0.20 | 0.02 | 0.39 | 100.31 |
| DT248 | 43.38 | 1.99 | 14.27 |  | 17.12 | 10.63 | 7.93 | 3.15 | 0.77 | 0.23 | 0.02 | 0.12 | 99.61 |
| DT661 | 47.60 | 1.38 | 17.90 |  | 13.50 | 5.95 | 8.97 | 2.56 | 0.48 | 0.22 | 0.14 | 0.41 | 99.11 |
| DT671 | 47.40 | 1.42 | 18.40 |  | 13.00 | 8.44 | 8.60 | 2.91 | 0.60 | 0.30 | 0.15 | 0.42 | 101.64 |
| DT646 | 47.86 | 2.45 | 17.48 |  | 12.50 | 5.10 | 9.84 | 2.31 | 1.01 | 0.52 | 0.18 | 0.75 | 100.00 |
| DT147 | 46.93 | 1.77 | 18.67 |  | 12.75 | 7.85 | 8.12 | 2.59 | 1.20 | 0.19 | 0.16 | 0.10 | 100.33 |
| DT163 | 47.14 | 2.67 | 15.65 |  | 14.89 | 6.46 | 8.50 | 2.91 | 0.97 | 0.35 | 0.20 | -0.18 | 99.56 |
| DT152 | 48.85 | 2.26 | 15.57 |  | 14.20 | 6.20 | 7.76 | 3.39 | 1.31 | 0.34 | 0.20 | -0.08 | 100.00 |
| DT154 | 47.85 | 2.25 | 16.35 |  | 13.99 | 6.26 | 8.82 | 2.88 | 1.08 | 0.38 | 0.19 | -0.01 | 100.04 |
| DT122 | 46.21 | 2.16 | 16.69 |  | 14.46 | 6.58 | 7.81 | 2.56 | 1.11 | 0.31 | 0.20 | 0.08 | 98.17 |
| BM23 | 46.30 | 3.02 | 14.90 |  | 17.50 | 4.31 | 7.59 | 3.64 | 1.15 | 0.48 | 0.22 | 0.43 | 99.54 |
| BM26 | 46.20 | 2.97 | 16.09 |  | 16.02 | 5.51 | 7.93 | 3.23 | 1.03 | 0.41 | 0.20 | 0.53 | 100.12 |
| BM28 | 47.10 | 2.97 | 16.08 |  | 12.12 | 6.30 | 10.96 | 2.69 | 0.63 | 0.25 | 0.14 | 0.11 | 99.35 |
| BM11 | 45.82 | 2.74 | 15.44 |  | 14.97 | 6.67 | 9.31 | 2.98 | 0.64 | 0.20 | 0.14 | 0.03 | 98.94 |
| BMX | 44.52 | 2.84 | 14.25 |  | 16.84 | 6.01 | 8.56 | 2.98 | 1.10 | 0.44 | 0.21 | 0.01 | 97.76 |
| BM18 | 46.35 | 2.53 | 17.70 |  | 15.50 | 6.02 | 7.80 | 3.27 | 0.76 | 0.32 | 0.18 | 0.12 | 100.55 |
| BM38 | 45.43 | 3.03 | 14.13 |  | 16.60 | 7.16 | 7.81 | 3.44 | 1.13 | 0.46 | 0.21 | 0.07 | 99.47 |
| BM8 | 45.73 | 3.02 | 14.61 |  | 17.01 | 6.14 | 8.48 | 3.12 | 1.07 | 0.37 | 0.21 | 0.24 | 100.00 |
| BMCTR | 46.37 | 2.99 | 14.81 |  | 16.50 | 5.07 | 7.53 | 3.51 | 1.42 | 0.48 | 0.21 | 0.26 | 99.15 |
| MG98 | 44.50 | 0.36 | 14.10 |  | 13.95 | 15.31 | 7.39 | 1.56 | 0.42 | 0.03 | 0.19 | 0.36 | 98.17 |
| BRI | 44.00 | 1.75 | 13.73 |  | 17.23 | 12.43 | 7.50 | 1.91 | 0.51 | 0.12 | 0.21 | 0.00 | 99.39 |
| OD651 | 52.05 | 0.52 | 24.17 |  | 4.80 | 2.22 | 11.29 | 3.55 | 0.39 | 0.10 | 0.06 | 0.36 | 99.51 |
| OD653 | 51.70 | 0.48 | 22.77 |  | 6.20 | 3.78 | 10.62 | 3.16 | 0.50 | 0.10 | 0.08 | 0.29 | 99.68 |
| LC11 | 51.38 | 2.24 | 19.53 |  | 8.00 | 2.03 | 12.75 | 2.62 | 0.98 | 0.50 | 0.11 | 0.20 | 100.34 |
| LC10 | 52.95 | 0.30 | 22.48 |  | 4.50 | 2.46 | 10.54 | 4.42 | 0.70 | 0.01 | 0.04 | 0.30 | 98.70 |
| LC14 | 53.07 | 1.65 | 21.30 |  | 5.20 | 1.86 | 8.24 | 3.80 | 1.92 | 0.37 | 0.06 | 1.19 | 98.66 |
| B15 | 50.86 | 1.65 | 18.34 |  | 8.53 | 4.73 | 10.86 | 3.08 | 0.68 | 0.11 | 0.00 | 0.12 | 98.96 |
| CBAN | 52.12 | 0.34 | 21.38 |  | 4.10 | 4.18 | 11.10 | 3.20 | 0.65 | 0.05 | 0.05 | 1.11 | 98.28 |
| COLDN | 49.19 | 1.50 | 17.70 |  | 11.50 | 6.65 | 10.73 | 2.35 | 0.12 | 0.26 | 0.20 | 0.00 | 100.20 |
| SRF | 51.20 | 2.61 | 17.87 |  | 10.37 | 2.53 | 9.37 | 3.10 | 1.43 | 0.45 | 0.15 | 0.27 | 99.35 |
| BS44 | 43.50 | 1.49 | 11.80 |  | 19.40 | 15.60 | 6.26 | 1.76 | 0.45 | 0.23 | 0.23 | 0.35 | 101.07 |
| CH190 | 42.80 | 1.61 | 10.90 |  | 19.80 | 15.10 | 5.64 | 2.40 | 0.68 | 0.14 | 0.24 | 0.56 | 99.87 |
| AV#2 | 43.96 | 2.08 | 14.30 |  | 17.40 | 10.51 | 7.63 | 2.70 | 0.71 | 0.20 | 0.02 | 0.32 | 99.83 |
| AV#3 | 46.77 | 2.45 | 16.50 |  | 15.10 | 6.42 | 8.15 | 3.12 | 0.91 | 0.36 | 0.20 | 0.02 | 100.00 |
| AV#5 | 46.90 | 2.30 | 15.30 |  | 15.30 | 6.74 | 9.10 | 2.53 | 0.96 | 0.35 | 0.17 | 0.41 | 100.06 |
| AV#6 | 47.14 | 1.93 | 17.70 |  | 13.23 | 6.30 | 9.30 | 2.20 | 0.71 | 0.35 | 0.16 | 0.48 | 99.50 |
| AV#1 | 47.37 | 2.33 | 16.67 |  | 13.95 | 6.75 | 8.20 | 2.87 | 1.14 | 0.30 | 0.18 | 0.10 | 99.86 |
| AVWTF | 53.54 | 0.72 | 22.50 |  | 5.30 | 2.21 | 10.12 | 3.70 | 1.19 | 0.13 | 0.07 | 0.12 | 99.60 |
| AVTX | 47.74 | 0.88 | 19.14 |  | 10.80 | 9.23 | 8.62 | 2.70 | 0.55 | 0.14 | 0.13 | 0.07 | 100.00 |
| AVOM | 47.80 | 0.80 | 18.02 |  | 11.50 | 10.40 | 8.85 | 2.80 | 0.56 | 0.11 | 0.12 | 0.08 | 101.04 |
| AVTH | 47.06 | 0.82 | 18.28 |  | 12.40 | 9.08 | 8.40 | 2.50 | 0.52 | 0.18 | 0.15 | 0.20 | 99.59 |
| AVLD | 46.95 | 1.85 | 17.80 |  | 13.05 | 8.12 | 8.45 | 3.10 | 0.65 | 0.20 | 0.16 | -0.15 | 100.18 |
| *Note:* Samples and data collected by James McLelland, professor emerti Colgate University. | | | | | | | | |  |  |  |  |  |
